# Supplementary material for: Anecdata: children’s and adults’ evaluation of anecdotal and statistical evidence
Source: Frontiers journal article supplement (doi:10.3389/fdpys.2024.1324704), 2024-03-04
Supplement: Table_5.pdf [file Table_5.pdf]

**Table A5**

*Mixed Effects Binomial Logistic Regression Models Predicting the Effect of Graph Choice on the Likelihood of Providing an Alternative Cause Justification at Each Age*

|                        | $\beta$  | <i>SE</i> | <i>z</i> | <i>OR</i> | 95 % CI        |
|------------------------|----------|-----------|----------|-----------|----------------|
| <b>7-year-olds</b>     |          |           |          |           |                |
| Intercept              | -4.20*** | 0.80      | -5.23    | 0.01      | [0.003, 0.072] |
| Graph Choice           | 0.55     | 0.55      | 0.99     | 1.73      | [0.58, 5.13]   |
| Number of Observations | 203      |           |          |           |                |
| Number of Groups       | 53       |           |          |           |                |
| Log Likelihood         | -30.4    |           |          |           |                |
| AIC                    | 66.8     |           |          |           |                |
| <b>10-year-olds</b>    |          |           |          |           |                |
| Intercept              | -1.74*   | 0.30      | -5.73    | 0.03      | [0.009, 0.079] |
| Graph Choice           | 0.91**   | 0.30      | 3.03     | 0.41      | [0.14, 1.26]   |
| Number of Observations | 216      |           |          |           |                |
| Number of Groups       | 55       |           |          |           |                |
| Log Likelihood         | -89.4    |           |          |           |                |
| AIC                    | 184.8    |           |          |           |                |
| <b>Adults</b>          |          |           |          |           |                |
| Intercept              | -1.07**  | 0.35      | -2.98    | 0.34      | [0.17, 0.69]   |

|                        |        |      |       |      |              |
|------------------------|--------|------|-------|------|--------------|
| Graph Choice           | -0.81+ | 0.39 | -2.05 | 0.45 | [0.21, 0.96] |
| Number of Observations | 256    |      |       |      |              |
| Number of Groups       | 65     |      |       |      |              |
| Log Likelihood         | -124.2 |      |       |      |              |
| AIC                    | 254.4  |      |       |      |              |

*Note.* Bonferroni adjusted p-value: \* $p < .0167$ , \*\* $p < .003$ , \*\*\* $p < .0003$ . *Trend level* p-values between .0167 and .05 are indicated by +. *OR* = odds ratio; *CI* = confidence interval.
